# Supplementary material for: Gene4HL: An Integrated Genetic Database for Hearing Loss
Source: Front Genet. 2021 Oct 18;12:773009. doi: 10.3389/fgene.2021.773009 (PMC8558372; doi:10.3389/fgene.2021.773009)
Supplement: Supplementary file 7 [file Table1.XLSX]

## Sheet: Table S1
	Supplemental Table 1. Public genomic data sources in Gene4HL
	Database	Brief Introduction	Website
	Entrez	The Entrez Global Query Cross-Database Search System is a federated search engine, or web portal that allows users to search many discrete health sciences databases at the National Center for Biotechnology Information (NCBI) website. The NCBI is a part of the National Library of Medicine (NLM), which is itself a department of the National Institutes of Health (NIH), which in turn is a part of the…	https://www.ncbi.nlm.nih.gov/Class/MLACourse/Original8Hour/Entrez/
	MIM	OMIM is a comprehensive, authoritative compendium of human genes and genetic phenotypes that is freely available and updated daily. The full-text, referenced overviews in OMIM contain information on all known mendelian disorders and over 15,000 genes. OMIM focuses on the relationship between phenotype and genotype. It is updated daily, and the entries contain copious links to other genetics resou…	http://omim.org/entry
	HGNC	HGNC is responsible for approving unique symbols and names for human loci, including protein coding genes, ncRNA genes and pseudogenes, to allow unambiguous scientific communication.	http://www.genenames.org
	Ensembl	Ensembl is a genome browser for vertebrate genomes that supports research in comparative genomics, evolution, sequence variation and transcriptional regulation. Ensembl annotate genes, computes multiple alignments, predicts regulatory function and collects disease data. Ensembl tools include BLAST, BLAT, BioMart and the Variant Effect Predictor (VEP) for all supported species.	http://asia.ensembl.org
	GeneCards	GeneCards is a searchable, integrative database that provides comprehensive, user-friendly information on all annotated and predicted human genes. It automatically integrates gene-centric data from ~125 web sources, including genomic, transcriptomic, proteomic, genetic, clinical and functional information.	http://www.genecards.org/
	RVIS	Residual Variation Intolerance Score (RVIS) is a gene-based score intended to help in the interpretation of human sequence data. The intolerance score in its current form is based upon allele frequency data as represented in whole exome sequence data from the NHLBI-ESP6500 data set. The score is designed to rank genes in terms of whether they have more or less common functional genetic variation …	http://genic-intolerance.org
	LoFtool	LoFtool is a novel gene intolerance ranking system which may help in ranking genes of interest based on their LoF intolerance and tissue expression.It predicts genome-wide de novo haploinsufficient mutations accurately and could be of help in search for genetic causes of rare Mendelian diseases. Moreover, its brain expression enrichment coupled to a ROC AUC of 0.86 in detecting neurodevelopmental…	https://www.ncbi.nlm.nih.gov/pubmed/27563026
	heptanucleotide context intolerance score	Varun Aggarwala and Benjamin F Voight applied 7-mer coding substitution probabilities to develop an intolerance score quantifying the difference between the expected and observed numbers of functional variants at a gene, with higher scores consistent with functional constraint.	https://www.ncbi.nlm.nih.gov/pmc/articles/PMC4811712
	GDI	the gene damage index (GDI) is describing the accumulated mutational damage for each human gene in the general population, and shows that highly mutated/damaged genes are unlikely to be disease-causing and yet they generate a big proportion of false positive variants harbored in such genes. Therefore removing high GDI genes is a very effective way to remove confidently false positives from WES/WG…	http://lab.rockefeller.edu/casanova/GDI
	Episcore	EpiScore, a methylation intensity algorithm was developed in methylation-positive men, using area under the curve of the receiver operating characteristic as metric for performance.	https://omictools.com/episcore-tool#maintainer
	pLI score	Many of you perform trio exome sequencing to detect de novo mutations in an affected individual. This is for a good reason, as we all know that the probability of a coding DNM to be disease-causing is very high. However, sometimes there are more than a single loss-of-function DNM in an exome, or the gene in which it occurs is simple not related to any disease yet. We looked over the shoulder of e…	http://blog.gene-talk.de/?p=639
	NCBI Gene	Gene integrates information from a wide range of species. A record may include nomenclature, Reference Sequences (RefSeqs), maps, pathways, variations, phenotypes, and links to genome-, phenotype-, and locus-specific resources worldwide.	https://www.ncbi.nlm.nih.gov/gene/
	InterVar	InterVar is a bioinformatics software tool for clinical interpretation of genetic variants by the ACMG/AMP 2015 guideline. The input to InterVar is an annotated file generated from ANNOVAR, while the output of InterVar is the classification of variants into 'Benign', 'Likely benign', 'Uncertain significance', 'Likely pathogenic' and 'Pathogenic', together with detailed evidence code.	http://wintervar.wglab.org
	COSMIC70	COSMIC is designed to store and display somatic mutation information and related details and contains information relating to human cancers. There are two types of data in COSMIC: Expert manual curation data and systematic screen data.The information in COSMIC is curated by expert scientists, primarily by scrutinizing large numbers of scientific publications.	http://cancer.sanger.ac.uk/cosmic
	ICGC	The International Cancer Genome Consortium (ICGC) generates comprehensive catalogues of genomic abnormalities (somatic mutations, abnormal expression of genes, epigenetic modifications) in tumors from 50 different cancer types and/or subtypes which are of clinical and societal importance across the globe and make the data available to the entire research community as rapidly as possible, and with…	https://icgc.org
	dbSNP	The Single Nucleotide Polymorphism database (dbSNP) is a public-domain archive for a broad collection of simple genetic polymorphisms.	https://www.ncbi.nlm.nih.gov/snp
	interPro	InterPro is a resource that provides functional analysis of protein sequences by classifying them into families and predicting the presence of domains and important sites. To classify proteins in this way, InterPro uses predictive models, known as signatures, provided by several different databases (referred to as member databases) that make up the InterPro consortium.It combines signatures from …	http://www.ebi.ac.uk/interpro/
	ClinVar	ClinVar is a freely accessible, public archive of reports of the relationships among human variations and phenotypes, with supporting evidence.The database includes germline and somatic variants of any size, type or genomic location. Interpretations are submitted by clinical testing laboratories, research laboratories, locus-specific databases, OMIM, GeneReviews, UniProt, expert panels and practi…	https://www.ncbi.nlm.nih.gov/clinvar
	nci60	The NCI-60 Human Tumor Cell Lines Screen has served the global cancer research community for >20 years. The screen was implemented in fully operational form in 1990 and utilizes 60 different human tumor cell lines to identify and characterize novel compounds with growth inhibition or killing of tumor cell lines. It is designed to screen up to 3,000 small molecules (synthetic or purified natural p…	https://dtp.cancer.gov/discovery_development/nci-60
	OMIM	OMIM (online mendelian inheritance in man) is a comprehensive, authoritative compendium of human genes and genetic phenotypes. It contains information on all known mendelian disorders and over 15,000 genes. And it focuses on the relationship between phenotype and genotype.	https://omim.org
	Gene4Denovo	Gene4Denovo is an integrated database and analytic platform for de novo mutations in humans. Gene4Denovo integrated 580,799 de novo mutations (DNMs), including 30,060 coding DNMs from 23,951 individuals, across 24 types of phenotypes. Gene4Denovo prioritized a list of candidate genes with different degree of statistical evidences, including 346 candidate genes with FDR < 0.05. Gene4Denovo also in…	http://www.genemed.tech/gene4denovo
	MGI	MGI is the international database resource for the laboratory mouse, providing integrated genetic, genomic, and biological data to facilitate the study of human health and disease.	http://www.informatics.jax.org
	HPO	The Human Phenotype Ontology (HPO) provides a standardized vocabulary of phenotypic abnormalities encountered in human disease. Each term in the HPO describes a phenotypic abnormality, such as atrial septal defect. The HPO is currently being developed using the medical literature, Orphanet, DECIPHER, and OMIM. HPO currently contains approximately 11,000 terms (still growing) and over 115,000 anno…	http://human-phenotype-ontology.github.io/
	UniProtKB	The UniProt Knowledgebase (UniProtKB) is the central hub for the collection of functional information on proteins, with accurate, consistent and rich annotation. In addition to capturing the core data mandatory for each UniProtKB entry (mainly, the amino acid sequence, protein name or description, taxonomic data and citation information), as much annotation information as possible is added. This …	http://www.uniprot.org/uniprot/
	Gene Ontology	The Gene Ontology (GO) project is a major bioinformatics initiative to develop a computational representation of our evolving knowledge of how genes encode biological functions at the molecular, cellular and tissue system levels. The project has developed formal ontologies that represent over 40,000 biological concepts, and are constantly being revised to reflect new discoveries. To date, these c…	http://geneontology.org
	InBio Map™	InBio Map is a high coverage, high quality, convenient and transparent platform for investigating and visualizing protein-protein interactions.	https://www.intomics.com/inbio/map/#home
	NCBI BioSystems	The NCBI BioSystems Database provides integrated access to biological systems and their component genes, proteins, and small molecules, as well as literature describing those biosystems and other related data throughout Entrez.	https://www.ncbi.nlm.nih.gov/biosystems
	GTEx	The Genotype-Tissue Expression (GTEx) project provides to the scientific community a resource with which to study human gene expression and regulation and its relationship to genetic variation. This project will collect and analyze multiple human tissues from donors who are also densely genotyped, to assess genetic variation within their genomes. By analyzing global RNA expression within individu…	http://www.gtexportal.org/
	The Human Protein Atlas	The Human Protein Atlas contains information for a large majority of all human protein-coding genes regarding the expression and localization of the corresponding proteins based on both RNA and protein data. The atlas consists of three subparts; cell, normal tissue, and cancer with each subpart containing images and data based on antibody-based proteomics and transcriptomics. The tissue atlas con…	http://www.proteinatlas.org/
	HomoloGene	HomoloGene is an automated system for constructing putative homology groups from the complete gene sets of a wide range of eukaryotic species.	https://www.ncbi.nlm.nih.gov/homologene
	TreeFam	TreeFam (Tree families database) is a database of phylogenetic trees of animal genes. It aims at developing a curated resource that gives reliable information about ortholog and paralog assignments, and evolutionary history of various gene families.	http://www.treefam.org/family
	DGIdb	The Drug-Gene Interaction database (DGIdb) mines existing resources that generate hypotheses about how mutated genes might be targeted therapeutically or prioritized for drug development. It provides an interface for searching lists of genes against a compendium of drug-gene interactions and potentially 'druggable' genes.It integrates data from 13 primary sources that cover disease-relevant human…	http://dgidb.genome.wustl.edu/
	gnomAD	The Genome Aggregation Database (gnomAD), is a coalition of investigators seeking to aggregate and harmonize exome and genome sequencing data from a variety of large-scale sequencing projects, and to make summary data available for the wider scientific community.The data set provided on this website spans 123,136 exomes and 15,496 genomes from unrelated individuals sequenced as part of various di…	http://gnomad.broadinstitute.org/
	ExAC	The Exome Aggregation Consortium (ExAC) is a coalition of investigators seeking to aggregate and harmonize exome sequencing data from a variety of large-scale sequencing projects, and to make summary data available for the wider scientific community.The data set provided on this website spans 60,706 unrelated individuals sequenced as part of various disease-specific and population genetic studies.	http://exac.broadinstitute.org/
	1000Genomes	The 1000 Genomes Project was the first project to sequence the genomes of a large number of people, to provide a comprehensive resource on human genetic variation. In the final phase of the project, data from 2,504 samples was combined to allow highly accurate assignment of the genotypes in each sample at all the variant sites the project discovered and the data was from 26 populations,including …	http://www.1000genomes.org/
	ESP6500	The dataset in NHLBI GO Exome Sequencing Project (ESP)is from the NHLBI GO Exome Sequencing Project and its ongoing studies which produced and provided exome variant calls for comparison .The current EVS data release (ESP6500SI-V2) is taken from 6503 samples drawn from multiple ESP cohorts and represents all of the ESP exome variant data.	http://evs.gs.washington.edu/EVS/
	Kaviar	Kaviar is a compilation of SNVs, indels, and complex variants observed in humans, designed to facilitate testing for the novelty and frequency of observed variants.Kaviar contains 162 million SNV sites (including 25M not in dbSNP) and incorporates data from 35 projects encompassing 77,781 individuals (13.2K whole genome, 64.6K exome).	http://db.systemsbiology.net/kaviar/
	HRC	The Haplotype Reference Consortium (HRC) is used for genotype imputation and phasing in other cohorts, typically genome-wide association studies (GWAS), where genotypes are available from genome-wide SNP microarrays.And it contains haplotypes from individuals with predominantly European ancestry, although the HRC includes the 1000 Genomes Project data.The first release consists of 64,976 haplotyp…	http://www.haplotype-reference-consortium.org
	SIFT	SIFT predicts whether an amino acid substitution affects protein function. SIFT prediction is based on the degree of conservation of amino acid residues in sequence alignments derived from closely related sequences, collected through PSI-BLAST. SIFT can be applied to naturally occurring nonsynonymous polymorphisms or laboratory-induced missense mutations.	http://sift.jcvi.org
	PolyPhen-2 HDIV	PolyPhen-2 is a tool which predicts possible impact of an amino acid substitution on the structure and function of a human protein using straightforward physical and comparative considerations.HumDiv-trained PolyPhen-2 is used for evaluating rare alleles at loci potentially involved in complex phenotypes, dense mapping of regions identified by genome-wide association studies, and analysis of natu…	http://genetics.bwh.harvard.edu/pph2
	PolyPhen-2 HVAR	PolyPhen-2 is a tool which predicts possible impact of an amino acid substitution on the structure and function of a human protein using straightforward physical and comparative considerations.HumVar-trained PolyPhen-2 can diagnose Mendelian diseases that requires distinguishing mutations with drastic effects from all the remaining human variation, including abundant mildly deleterious alleles.	http://genetics.bwh.harvard.edu/pph2
	LRT	A likelihood ratio test (LRT) can accurately identify a subset of deleterious mutations that disrupt highly conserved amino acids within protein-coding sequences, which are likely to be unconditionally deleterious.	http://www.genetics.wustl.edu/jflab/lrt_query.html
	MutationTaster	MutationTaster employs a Bayes classifier to eventually predict the disease potential of an alteration. The Bayes classifier is fed with the outcome of all tests and the features of the alterations and calculates probabilities for the alteration to be either a disease mutation or a harmless polymorphism.	http://www.mutationtaster.org
	MutationAssessor	MutationAssessor predicts the functional impact of amino-acid substitutions in proteins, such as mutations discovered in cancer or missense polymorphisms. The functional impact is assessed based on evolutionary conservation of the affected amino acid in protein homologs.	http://mutationassessor.org
	FATHMM	Functional Analysis through Hidden Markov Models(FATHMM) is specifically designed for non-synonymous single nucleotide variants (nsSNVs).	http://fathmm.biocompute.org.uk
	PROVEAN	Protein Variation Effect Analyzer (PROVEAN) is a software tool which predicts whether an amino acid substitution or indel has an impact on the biological function of a protein. It is useful for filtering sequence variants to identify nonsynonymous or indel variants that are predicted to be functionally important.	http://provean.jcvi.org/
	MetaSVM	MetaSVM is a ensemble scoring method for deleterious missense mutations.It integratea nine deleteriousness prediction scores and maximum minor allele frequency for more accurate and comprehensive evaluation of deleteriousness of missense mutations.	https://www.ncbi.nlm.nih.gov/pubmed/25552646
	MetaLR	MetaLR is a ensemble scoring method for deleterious missense mutations. It achieves the highest discriminative power compared to all eighteen existing deleteriousness prediction scores, which demonstrated the value of combining information from multiple orthologous approaches.	https://www.ncbi.nlm.nih.gov/pubmed/25552646
	VEST 3.0	M-CAP is a pathogenicity classifier for rare missense variants in the human genome that is tuned to the high sensitivity required in the clinic. By combining previous pathogenicity scores (including SIFT, Polyphen-2 and CADD) with novel features and a powerful model, they attain the best classifier at all thresholds, reducing a typical exome/genome rare (<1%) missense variant (VUS) list from 300 …	http://bejerano.stanford.edu/MCAP
	CADD	Combined Annotation Dependent Depletion (CADD) is a tool for scoring the deleteriousness of single nucleotide variants as well as insertion/deletions variants in the human genome. It is a framework that integrates multiple annotations into one metric by contrasting variants that survived natural selection with simulated mutations.	http://cadd.gs.washington.edu/
	GERP++	GERP++ is a new tool that uses maximum likelihood evolutionary rate estimation for position-specific scoring and, in contrast to previous bottomup methods, a novel dynamic programming approach to subsequently define constrained elements. GERP++ evaluates a richer set of candidate element breakpoints and ranks them based on statistical significance, eliminating the need for biased heuristic extens…	http://mendel.stanford.edu/SidowLab/downloads/gerp/index.html
	DANN	DANN is a deep learning approach for annotating the pathogenicity of whole-genome genetic variants.DANN uses the same feature set and training data as CADD to train a deep neural network (DNN). DNNs can capture non-linear relationships among features and are better suited than SVMs for problems with a large number of samples and features.	https://cbcl.ics.uci.edu/public_data/DANN/
	fathmm-MKL	fathmm-MKL is capable of predicting the functional effects of protein missense mutations by combining sequence conservation within hidden Markov models (HMMs), representing the alignment of homologous sequences and conserved protein domains, with "pathogenicity weights", representing the overall tolerance of the protein/domain to mutations.	http://fathmm.biocompute.org.uk
	Eigen	Eigen is a spectral approach to the functional annotation of genetic variants in coding and noncoding regions. Eigen makes use of a variety of functional annotations in both coding and noncoding regions (such as made available by the ENCODE and Roadmap Epigenomics projects), and combines them into one single measure of functional importance.	http://www.columbia.edu/~ii2135/eigen.html
	GenoCanyon	GenoCanyon is a statistical framework to predict functional non-coding regions in the human genome through integrated analysis of annotation data.Meanwhile,it is a whole-genome functional annotation approach based on unsupervised statistical learning. It integrates genomic conservation measures and biochemical annotation data to predict the functional potential at each nucleotide.	http://genocanyon.med.yale.edu/
	fitCons	The fitness consequences of functional annotation(fitCons) integrates functional assays (such as ChIP-Seq) with selective pressure inferred using the INSIGHT method. The result is a score ρ in the range [0.0-1.0] that indicates the fraction of genomic positions evincing a particular pattern (or "fingerprint") of functional assay results, that are under selective pressure.	http://compgen.cshl.edu/fitCons/
	PhyloP	PhyloP scores measure evolutionary conservation at individual alignment sites.And the phyloP scores are useful to evaluate signatures of selection at particular nucleotides or classes of nucleotides (e.g., third codon positions, or first positions of miRNA target sites).	http://compgen.bscb.cornell.edu/phast
	PhastCons	PHAST is a freely available software package for comparative and evolutionary genomics. It consists of about half a dozen major programs, plus more than a dozen utilities for manipulating sequence alignments, phylogenetic trees, and genomic annotations.	http://compgen.cshl.edu/phast/
	SiPhy	SiPhy is a approach that takes advantage of deeply sequenced clades to identify evolutionary selection by uncovering not only signatures of rate-based conservation but also substitution patterns characteristic of sequence undergoing natural selection.	http://portals.broadinstitute.org/genome_bio/siphy/
	REVEL	REVEL is a new ensemble method for predicting the pathogenicity of missense variants based on a combination of scores from 13 individual tools: MutPred, FATHMM v2.3, VEST 3.0, Polyphen-2, SIFT, PROVEAN, MutationAssessor, MutationTaster, LRT, GERP++, SiPhy, phyloP, and phastCons. REVEL was trained using recently discovered pathogenic and rare neutral missense variants, excluding those previously u…	https://sites.google.com/site/revelgenomics/
	RefSeqGene	The RefSeq Genes contains known human protein-coding and non-protein-coding genes taken from the NCBI RNA reference sequences collection (RefSeq).	https://www.ncbi.nlm.nih.gov/refseq/rsg/
	ReVe	ReVe is a method that combinated of REVEL and VEST3, to predict the pathogenicity of missense variants. ReVe showed the best performance for distinguishing pathogenic variants.	http://varcards.biols.ac.cn
